# Supplementary material for: In Vitro and In Vivo Assessment of the Efficacy of Bromoageliferin, an Alkaloid Isolated from the Sponge Agelas dilatata, against Pseudomonas aeruginosa
Source: PubMed Central journal article supplement (PMC7345159; doi:10.3390/md18060326), 2020-06-23
Supplement: marinedrugs-18-00326-s001.pdf [file marinedrugs-18-00326-s001.pdf]

## Supplementary Material

# In Vitro and in Vivo Assessment of the Efficacy of Bromoageliferin, an Alkaloid Isolated from the Sponge *Agelas dilatata*, against *Pseudomonas aeruginosa*

**Dawrin Pech-Puch<sup>1</sup>, Mar Pérez-Povedano<sup>1</sup>, Marta Martínez-Gutián<sup>2</sup>, Cristina Lasarte-Monterrubio<sup>2</sup>, Juan Carlos Vázquez-Ucha<sup>2</sup>, German Bou<sup>2</sup>, Jaime Rodríguez<sup>1,\*</sup>, Alejandro Beceiro<sup>2,\*,\*†</sup> and Carlos Jiménez<sup>1,\*,\*†</sup>**

<sup>1</sup> Centro de Investigacións Científicas Avanzadas (CICA) e Departamento de Química, Facultade de Ciencias, AE CICA-INIBIC, Universidade da Coruña, 15071 A Coruña, Spain; dawrin.j.pech@udc.es (D.P.-P.); perezpovedanomaranabel@gmail.com (M.P.-P.)

<sup>2</sup> Servicio de Microbiología. Instituto de Investigación Biomédica, AE CICA-INIBIC Complejo Hospitalario Universitario A Coruña, 15006, A Coruña, Spain; m.martinez.guitian@gmail.com (M.M.-G.); crlasarm@gmail.com (C.L.-M.); juan.vazquez@udc.es (J.C.V.-U.); German.Bou.Arevalo@sergas.es (G.B.)

\* Correspondence: jaime.rodriguez@udc.es (J.R.); alejandro.beceiro.casas@sergas.es (A.B.); carlos.jimenez@udc.es (C.J.)

† Same contribution to this work

## INDEX

|                                                                                         |     |
|-----------------------------------------------------------------------------------------|-----|
| <b>Figure S1-S2.</b> NMR spectra data of compound <b>1</b> in CD <sub>3</sub> OD.....   | S3  |
| <b>Figure S3.</b> (-)-HRESIMS of compound <b>1</b> .....                                | S4  |
| <b>Figure S4-S5.</b> NMR spectra data of compound <b>2</b> in CD <sub>3</sub> OD.....   | S5  |
| <b>Figure S6.</b> (-)-HRESIMS of compound <b>2</b> .....                                | S6  |
| <b>Figure S7-S8.</b> NMR spectra data of compound <b>3</b> in CD <sub>3</sub> OD.....   | S7  |
| <b>Figure S9.</b> (-)-HRESIMS of compound <b>3</b> .....                                | S8  |
| <b>Figure S10-S11.</b> NMR spectra data of compound <b>4</b> in CD <sub>3</sub> OD..... | S9  |
| <b>Figure S12.</b> (+)-HRESIMS of compound <b>4</b> .....                               | S10 |
| <b>Figure S13-S14.</b> NMR spectra data of compound <b>5</b> in CD <sub>3</sub> OD..... | S11 |
| <b>Figure S15.</b> (-)-HRESIMS of compound <b>5</b> .....                               | S12 |
| <b>Figure S16-S17.</b> NMR spectra data of compound <b>6</b> in CD <sub>3</sub> OD..... | S13 |
| <b>Figure S18.</b> (-)-HRESIMS of compound <b>6</b> .....                               | S14 |
| <b>Figure S19-S20.</b> NMR spectra data of compound <b>7</b> in CD <sub>3</sub> OD..... | S15 |
| <b>Figure S21.</b> (-)-HRESIMS of compound <b>7</b> .....                               | S16 |
| <b>Figure S22-S23.</b> NMR spectra data of compound <b>8</b> in D <sub>2</sub> O.....   | S17 |
| <b>Figure S24.</b> (+)-HRESIMS of compound <b>8</b> .....                               | S18 |

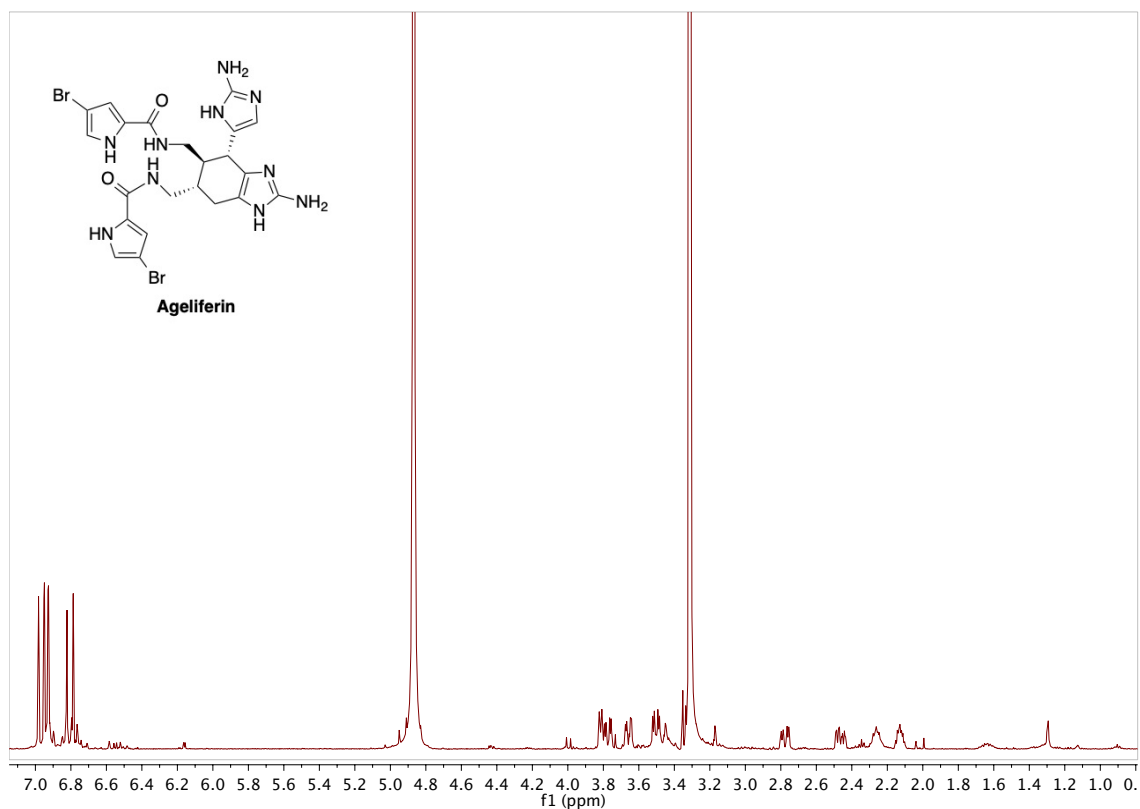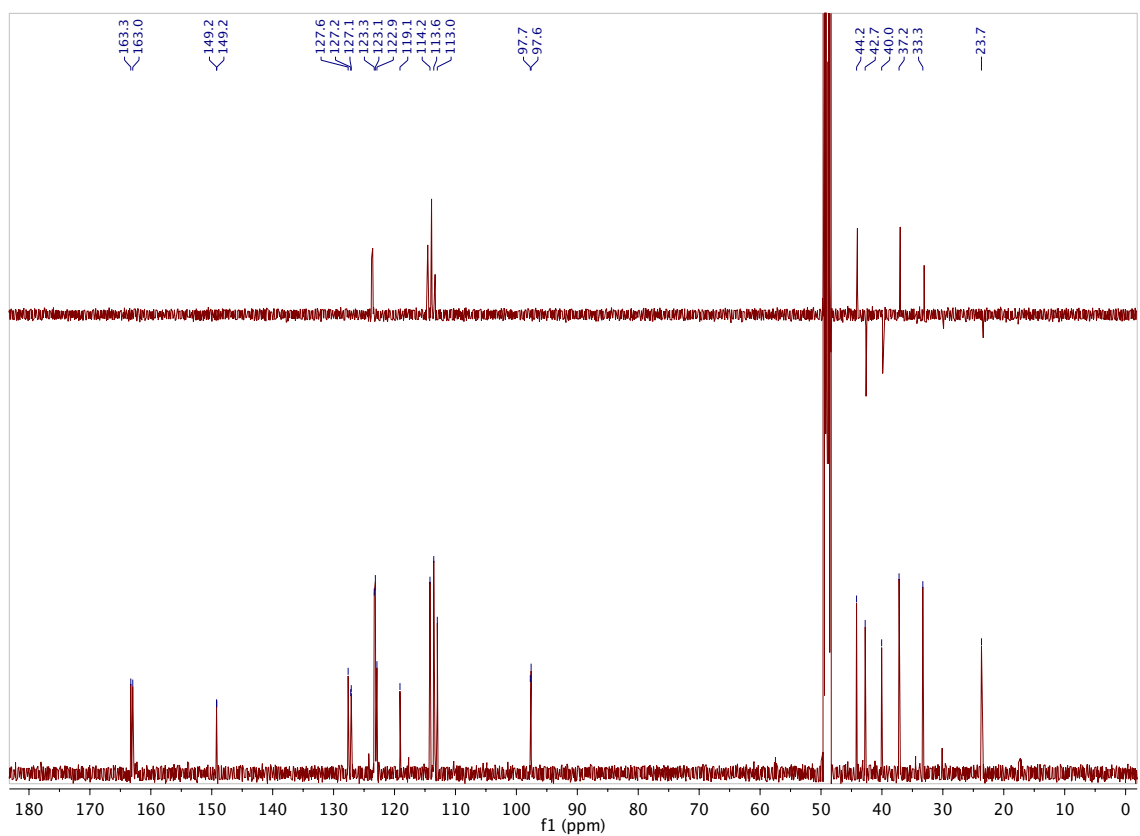

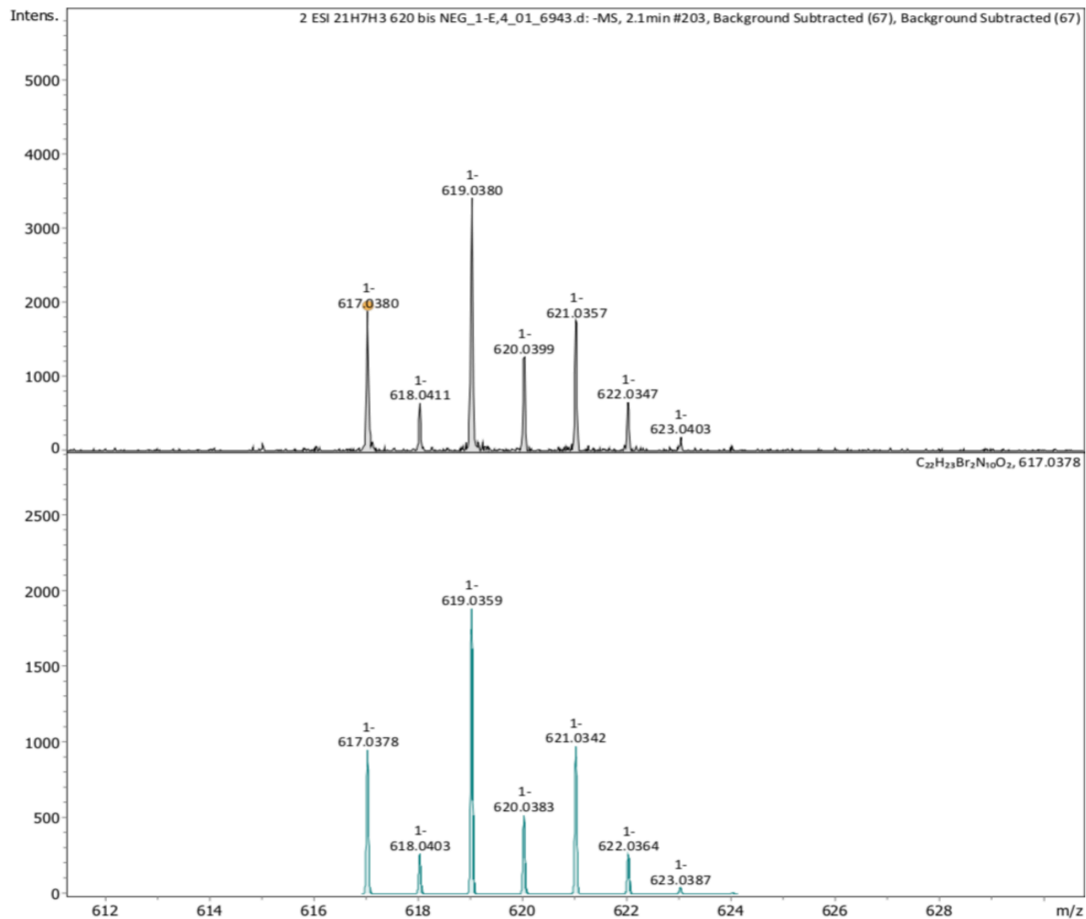

| Meas. m/z | # | Ion Formula    | Score  | m/z      | err [mDa] | err [ppm] | mSigma | rdb  | e <sup>-</sup> Conf | N-Rule |
|-----------|---|----------------|--------|----------|-----------|-----------|--------|------|---------------------|--------|
| 617.0380  | 1 | C22H23Br2N10O2 | 100.00 | 617.0378 | -0.2      | -0.4      | 51.0   | 19.0 | even                | ok     |
|           | 2 | C23H29Br2N3O7  | 86.31  | 617.0378 | -0.2      | -0.4      | 55.8   | 13.5 | odd                 | ok     |

Figure S3. (-)-HRESIMS of 1.

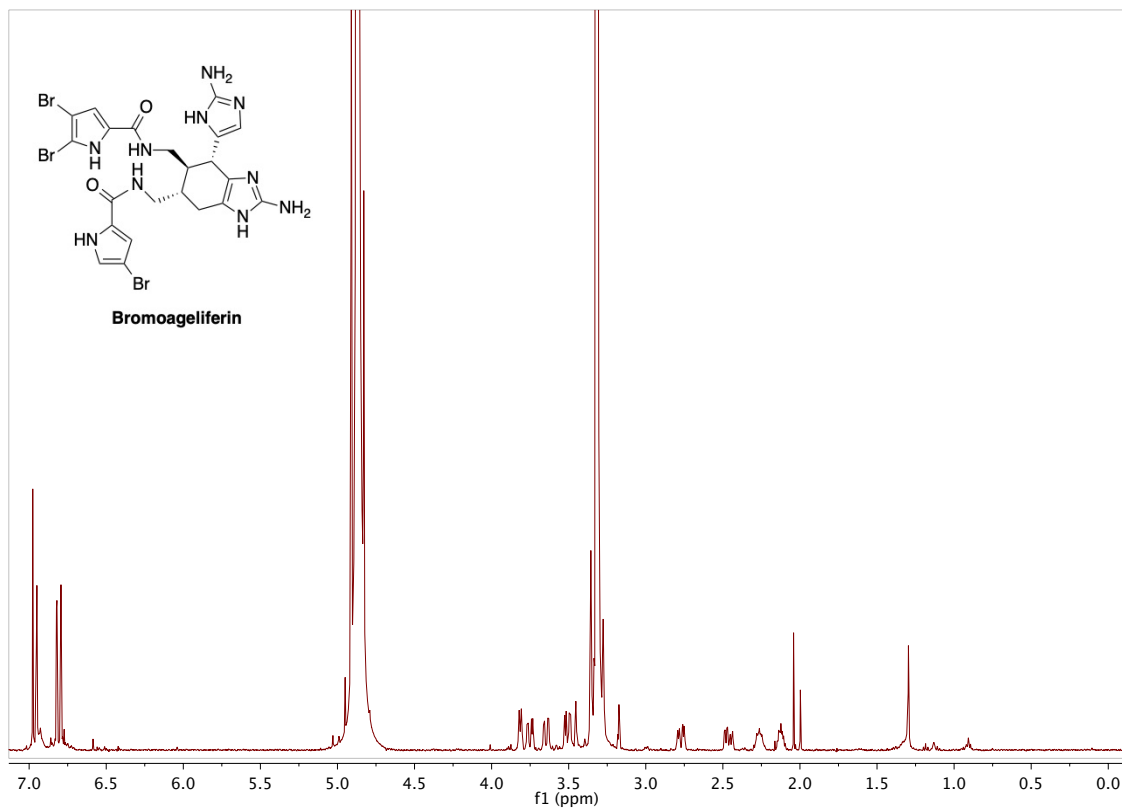

**Figure S4.**  $^1\text{H}$  NMR spectrum of **2** (500 MHz,  $\text{CD}_3\text{OD}$ ).

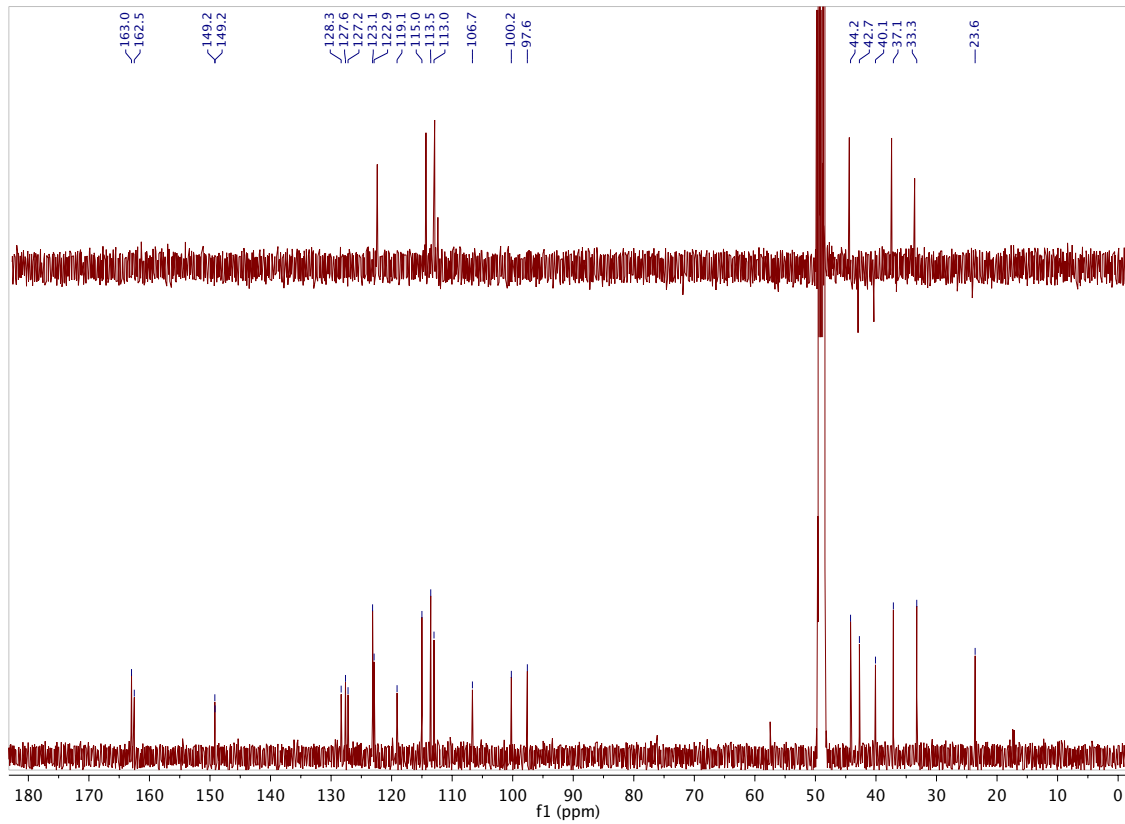

**Figure S5.**  $^{13}\text{C}$  NMR and DEPT-135 spectra of **2** (125 MHz,  $\text{CD}_3\text{OD}$ ).

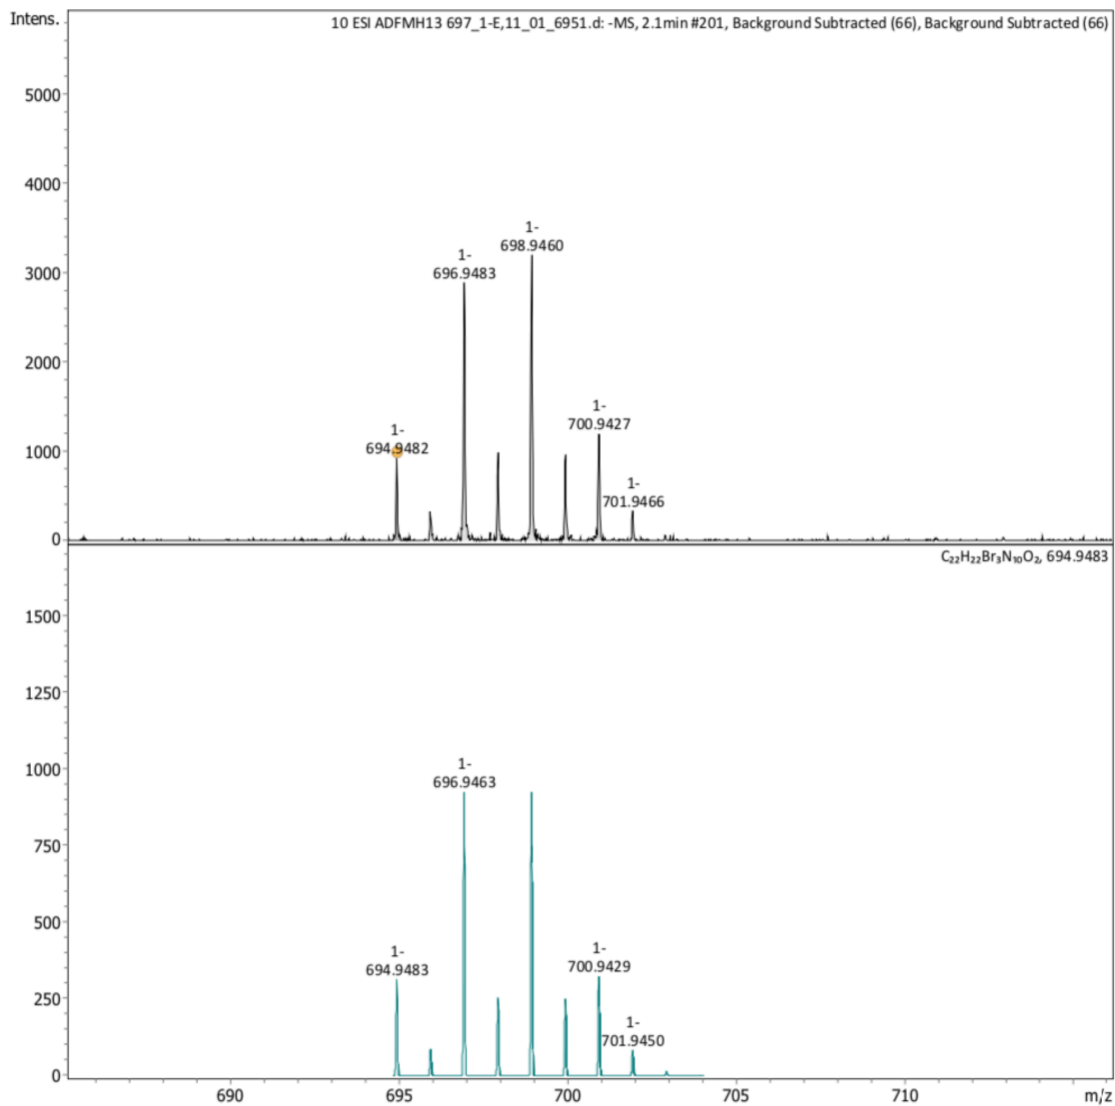

| Meas. m/z | # | Ion Formula                                                                    | Score  | m/z      | err [mDa] | err [ppm] | mSigma | rdb  | e <sup>-</sup> Conf | N-Rule |
|-----------|---|--------------------------------------------------------------------------------|--------|----------|-----------|-----------|--------|------|---------------------|--------|
| 694.9482  | 1 | C <sub>23</sub> H <sub>28</sub> Br <sub>3</sub> N <sub>3</sub> O <sub>7</sub>  | 100.00 | 694.9483 | 0.1       | 0.2       | 41.7   | 15.5 | odd                 | ok     |
|           | 2 | C <sub>22</sub> H <sub>22</sub> Br <sub>3</sub> N <sub>10</sub> O <sub>2</sub> | 86.11  | 694.9483 | 0.1       | 0.2       | 42.9   | 21.0 | even                | ok     |

Figure S6. (-)-HRESIMS of 2.

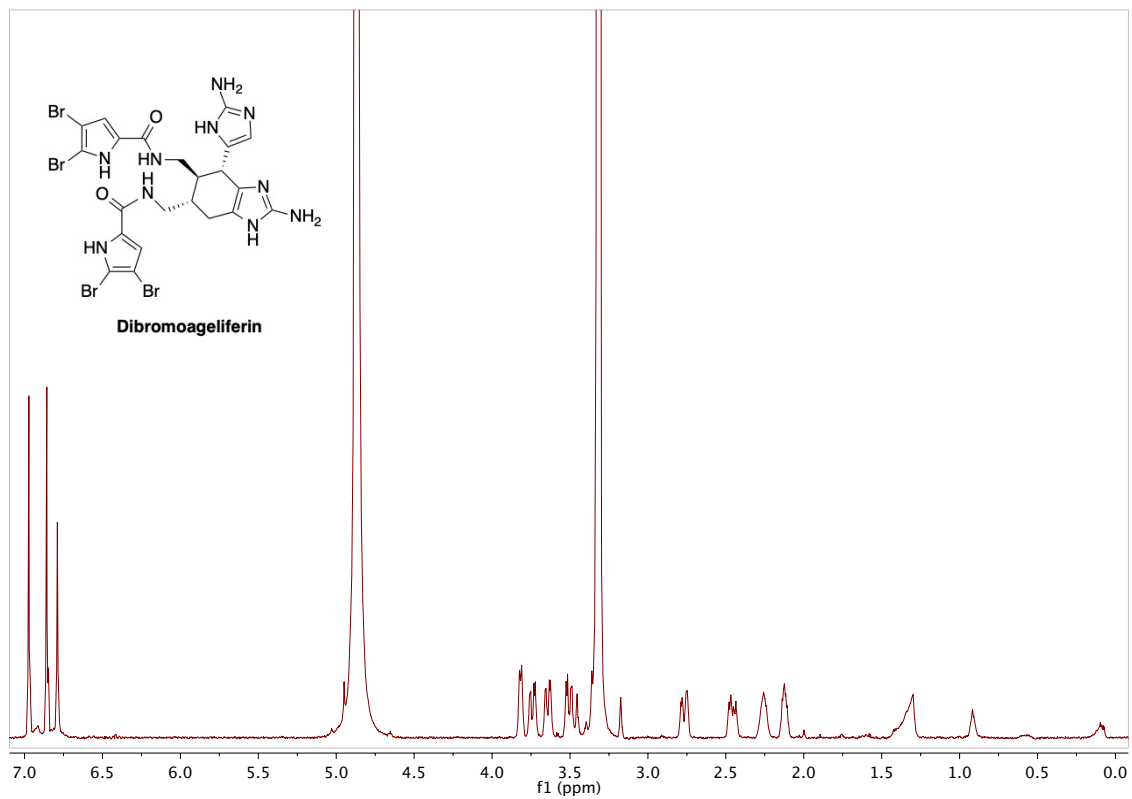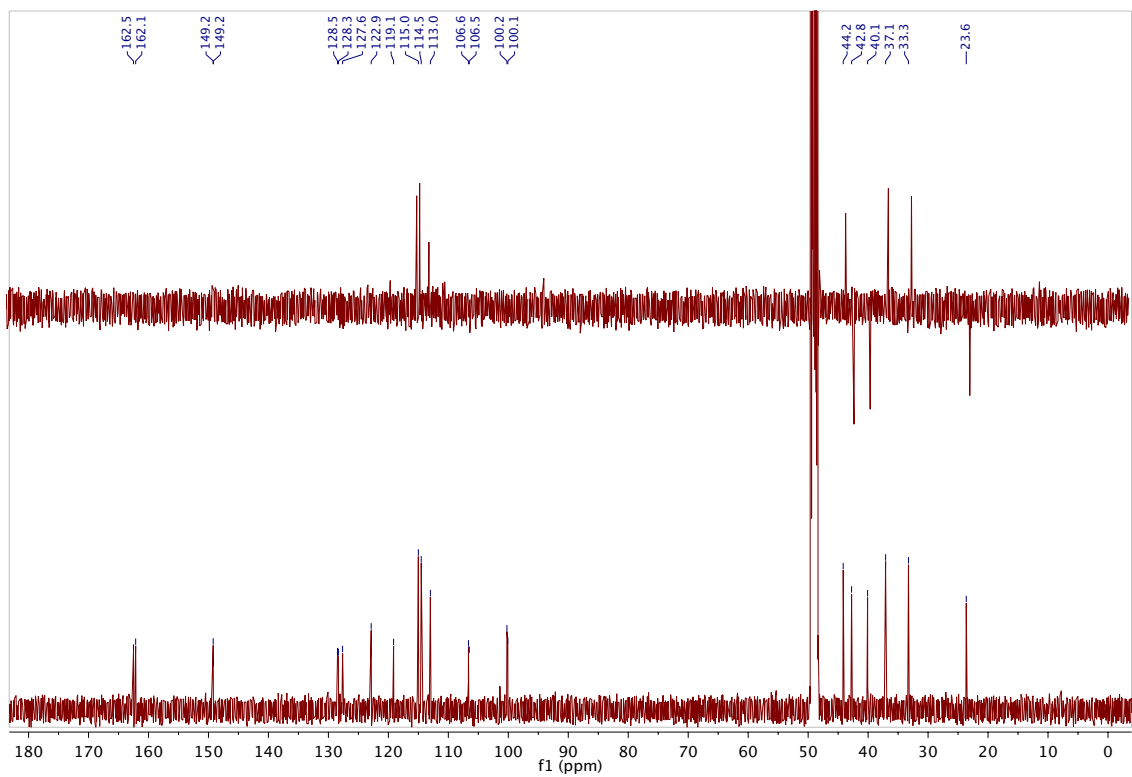

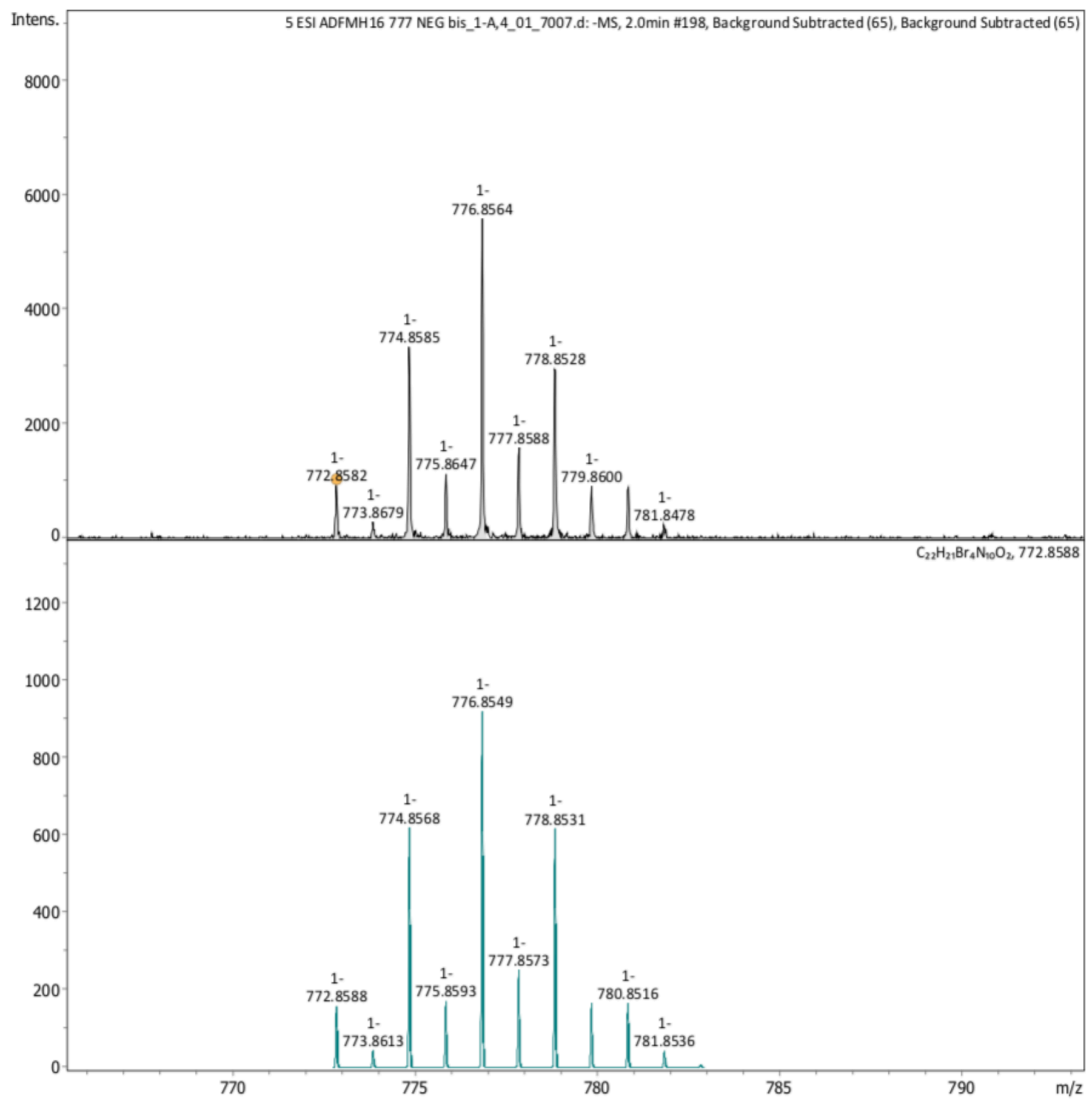

| Meas. m/z | # | Ion Formula    | Score  | m/z      | err [mDa] | err [ppm] | mSigma | rdb  | e <sup>-</sup> Conf | N-Rule |
|-----------|---|----------------|--------|----------|-----------|-----------|--------|------|---------------------|--------|
| 772.8582  | 1 | C20H19Br4N13O  | 94.77  | 772.8575 | -0.7      | -1.0      | 52.5   | 23.5 | odd                 | ok     |
|           | 2 | C18H17Br4N16   | 39.54  | 772.8561 | -2.1      | -2.7      | 52.6   | 24.0 | even                | ok     |
|           | 3 | C22H21Br4N10O2 | 100.00 | 772.8588 | 0.6       | 0.8       | 52.8   | 23.0 | even                | ok     |
|           | 4 | C24H23Br4N7O3  | 42.17  | 772.8601 | 2.0       | 2.5       | 53.6   | 22.5 | odd                 | ok     |
|           | 5 | C23H27Br4N3O7  | 95.59  | 772.8588 | 0.6       | 0.8       | 54.2   | 17.5 | odd                 | ok     |

Figure S9. (-)-HRESIMS of 3.



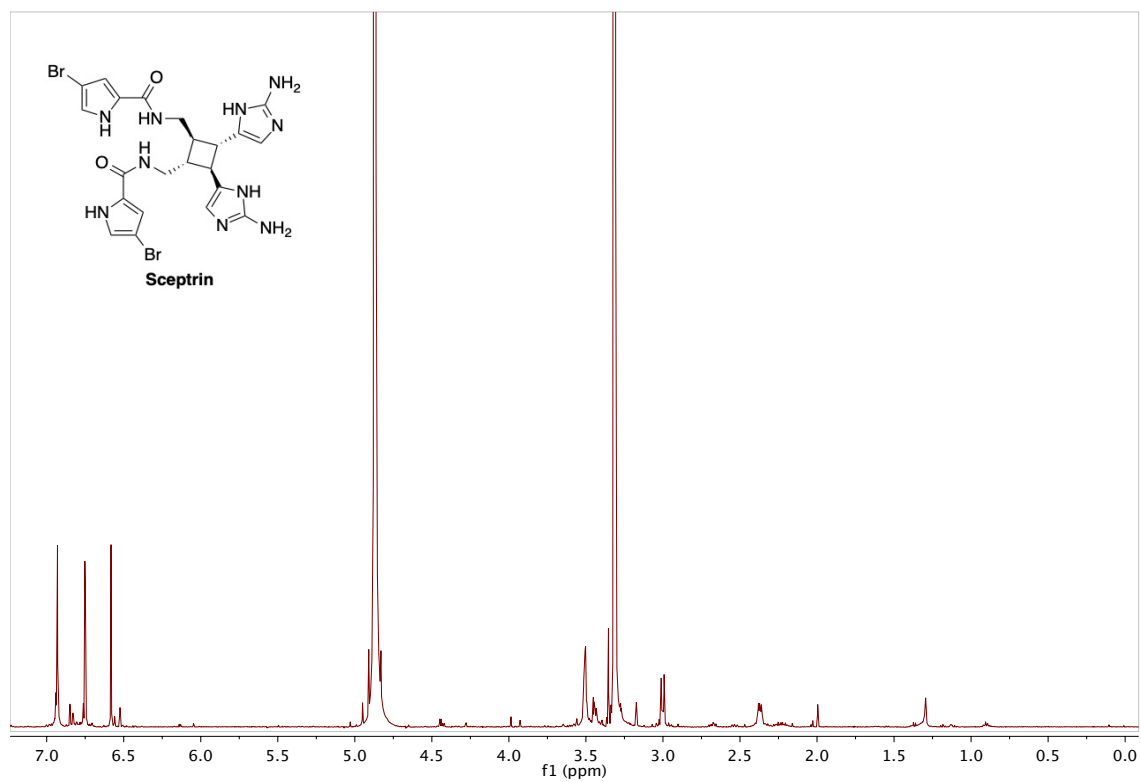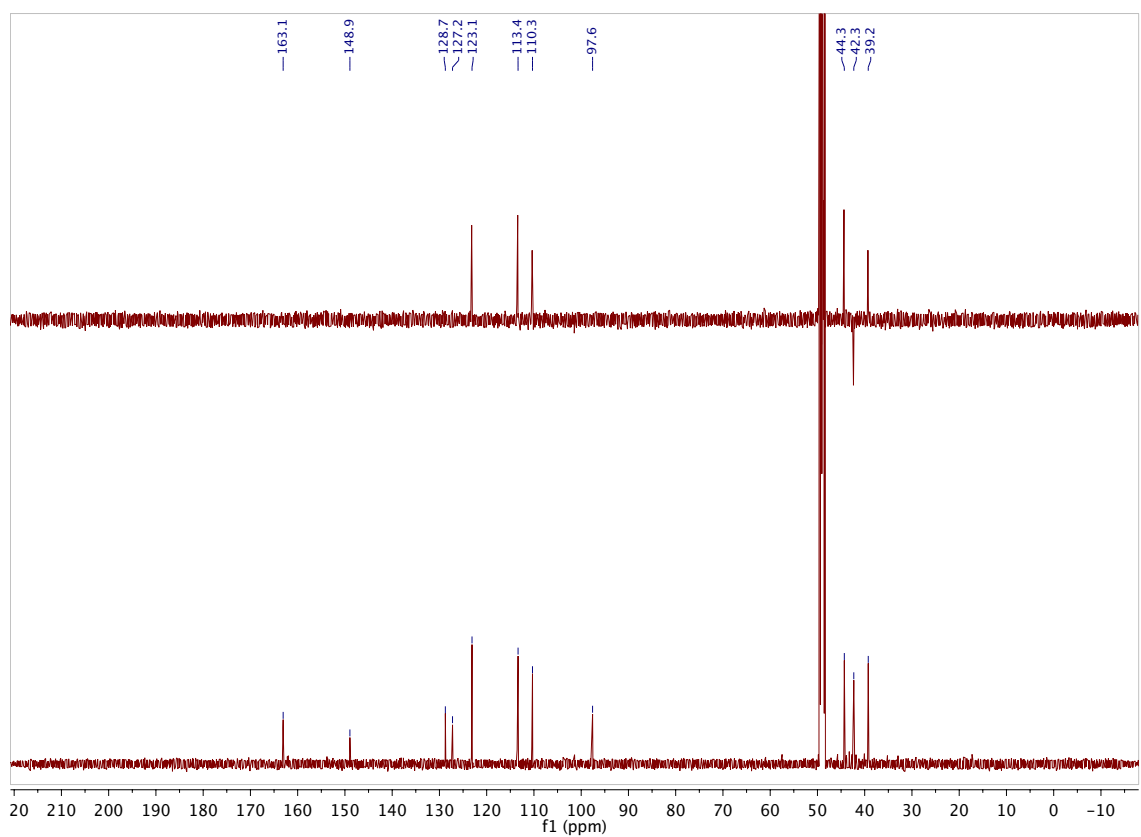

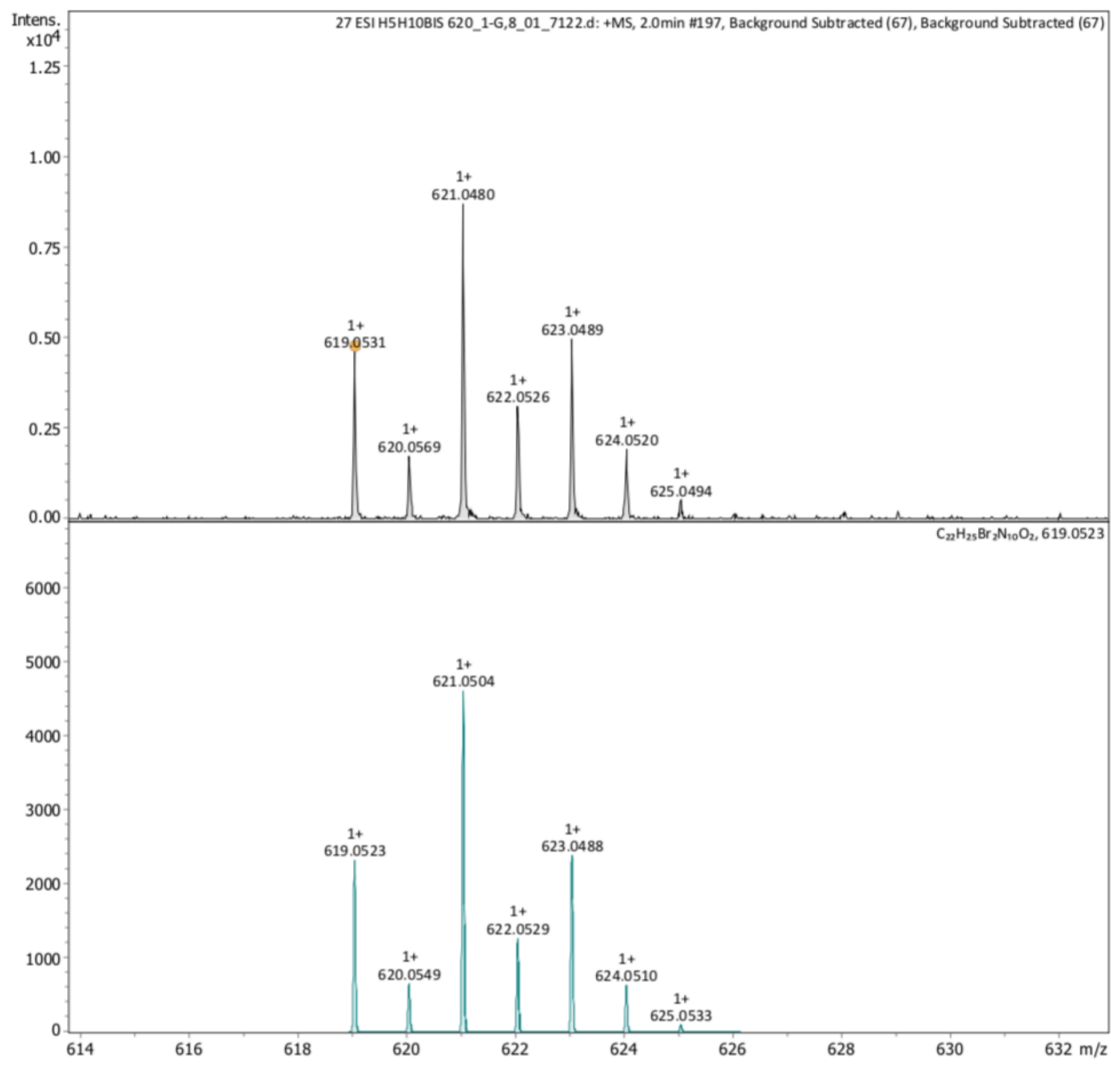

| Meas. m/z | # | Ion Formula    | Score  | m/z      | err [mDa] | err [ppm] | mSigma | rdb  | e <sup>-</sup> Conf | N-Rule |
|-----------|---|----------------|--------|----------|-----------|-----------|--------|------|---------------------|--------|
| 619.0531  | 1 | C26H29Br2N4O4  | 50.48  | 619.0550 | 1.9       | 3.1       | 47.1   | 18.0 | even                | ok     |
|           | 2 | C24H27Br2N7O3  | 100.00 | 619.0537 | 0.6       | 0.9       | 52.0   | 18.5 | odd                 | ok     |
|           | 3 | C25H33Br2O8    | 89.48  | 619.0537 | 0.6       | 0.9       | 55.4   | 13.0 | even                | ok     |
|           | 4 | C22H25Br2N10O2 | 77.93  | 619.0523 | -0.8      | -1.2      | 56.9   | 19.0 | even                | ok     |
|           | 5 | C23H31Br2N3O7  | 69.50  | 619.0523 | -0.8      | -1.2      | 60.4   | 13.5 | odd                 | ok     |

Figure S12. (+)-HRESIMS of 4.

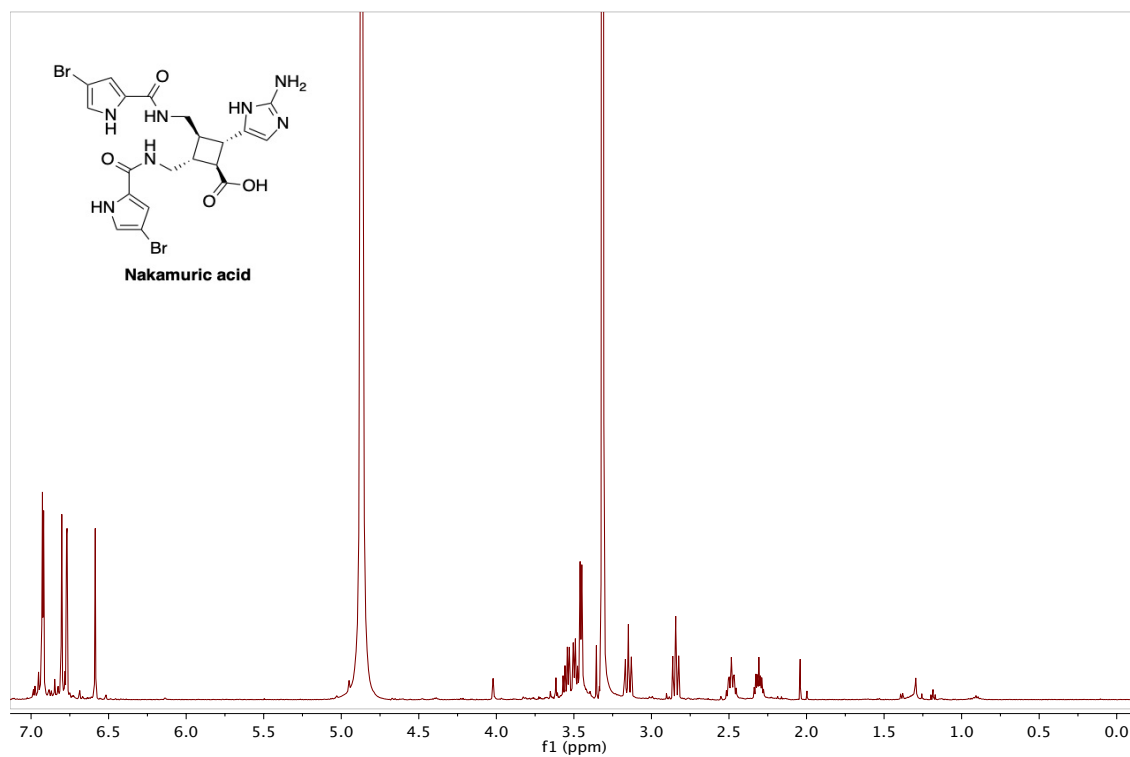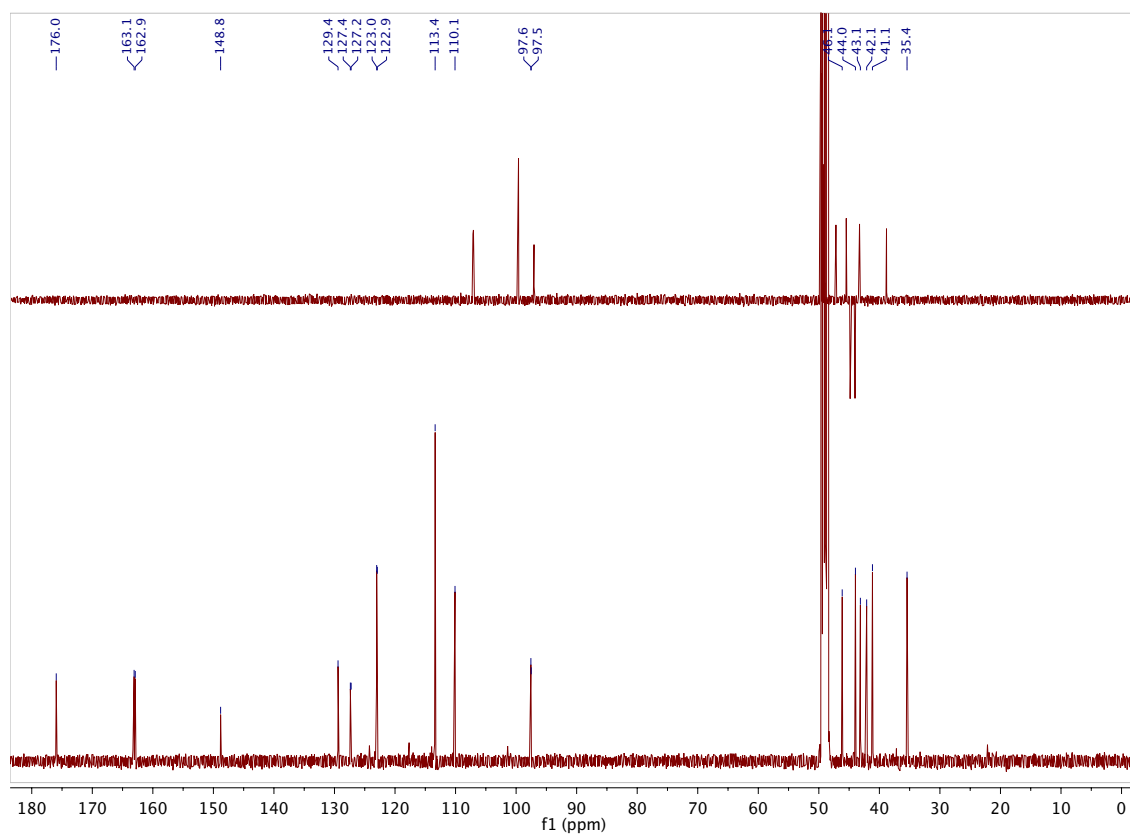

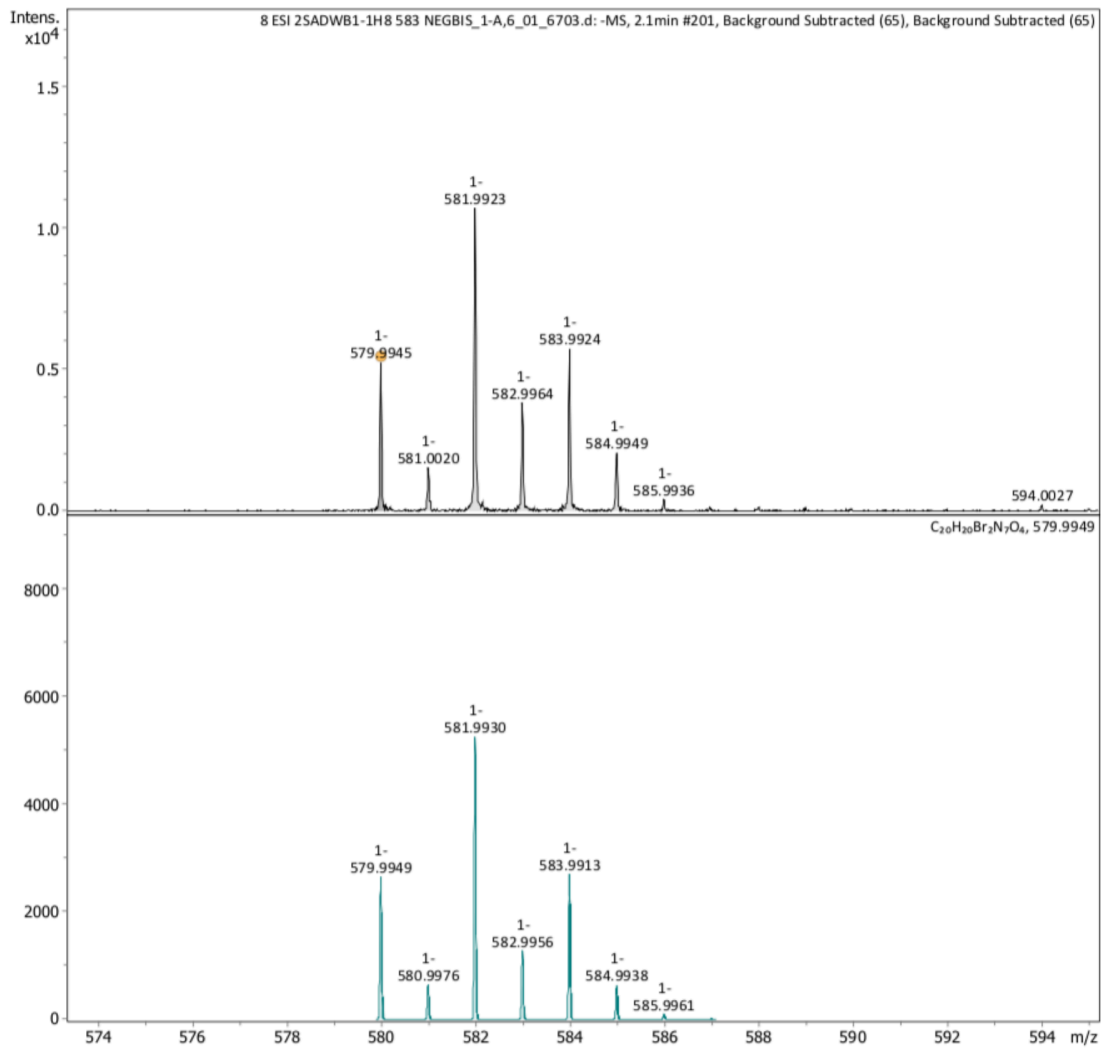

| Meas. m/z | # | Ion Formula    | Score  | m/z      | err [mDa] | err [ppm] | mSigma | rdb  | e <sup>-</sup> Conf | N-Rule |
|-----------|---|----------------|--------|----------|-----------|-----------|--------|------|---------------------|--------|
| 579.9945  | 1 | C20H20Br2N7O4  | 100.00 | 579.9949 | 0.4       | 0.6       | 52.2   | 17.0 | even                | ok     |
|           | 2 | C21H26Br2O9    | 86.64  | 579.9949 | 0.4       | 0.6       | 56.6   | 11.5 | odd                 | ok     |
|           | 3 | C18H18Br2N10O3 | 61.72  | 579.9936 | -1.0      | -1.7      | 57.4   | 17.5 | odd                 | ok     |
|           | 4 | C19H24Br2N3O8  | 53.34  | 579.9936 | -1.0      | -1.7      | 61.8   | 12.0 | even                | ok     |

Figure S15. (-)-HRESIMS of 5.

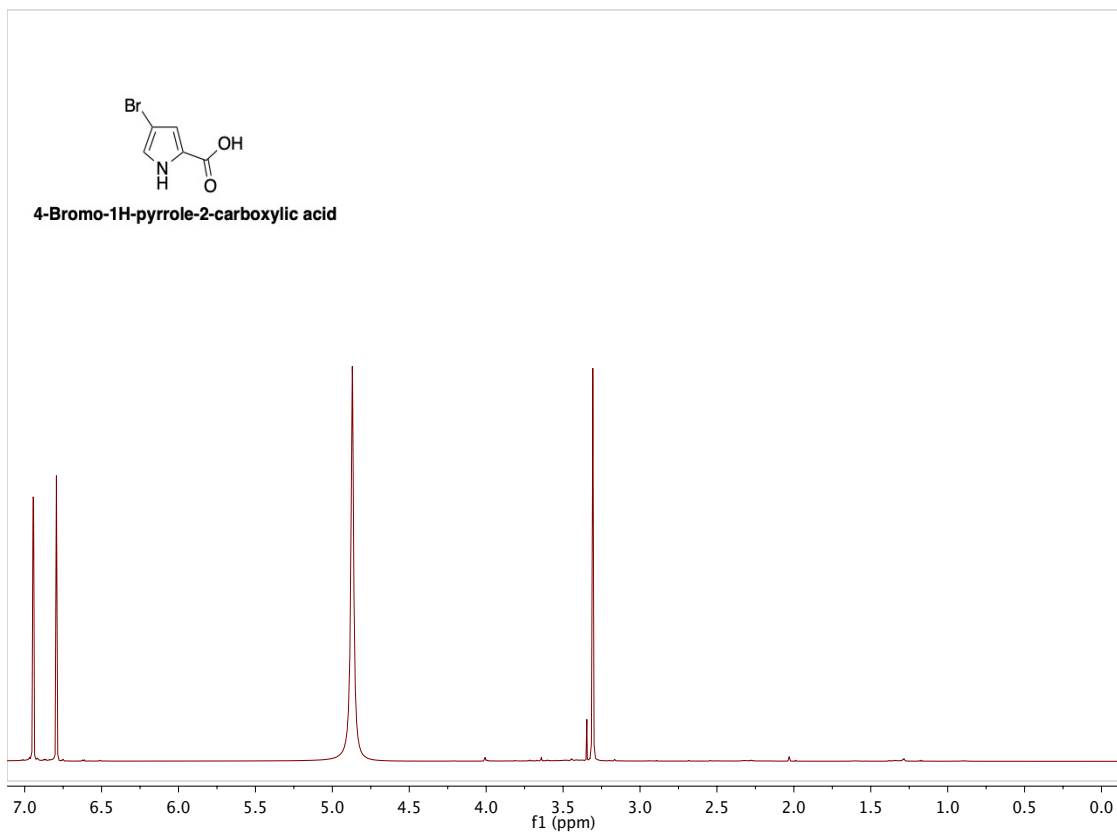

**Figure S16.**  $^1\text{H}$  NMR spectrum of **6** (500 MHz,  $\text{CD}_3\text{OD}$ ).

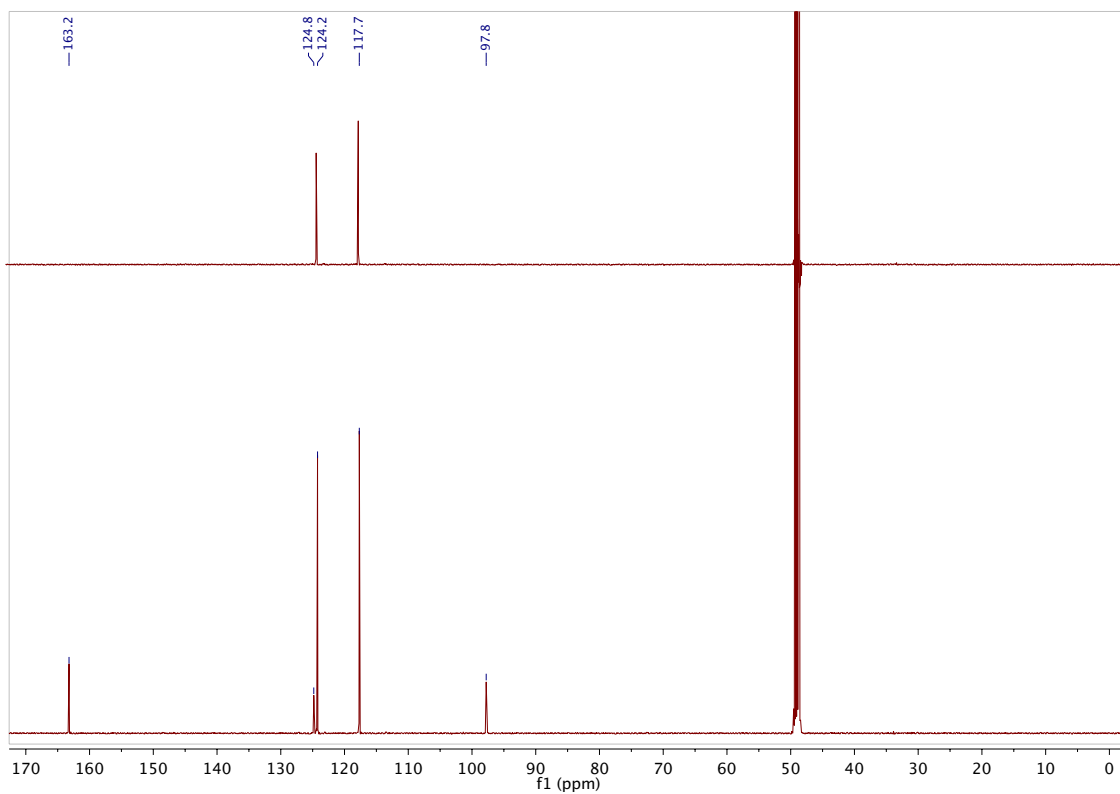

**Figure S17.**  $^{13}\text{C}$  NMR and DEPT-135 spectra of compound **6** (125 MHz,  $\text{CD}_3\text{OD}$ ).

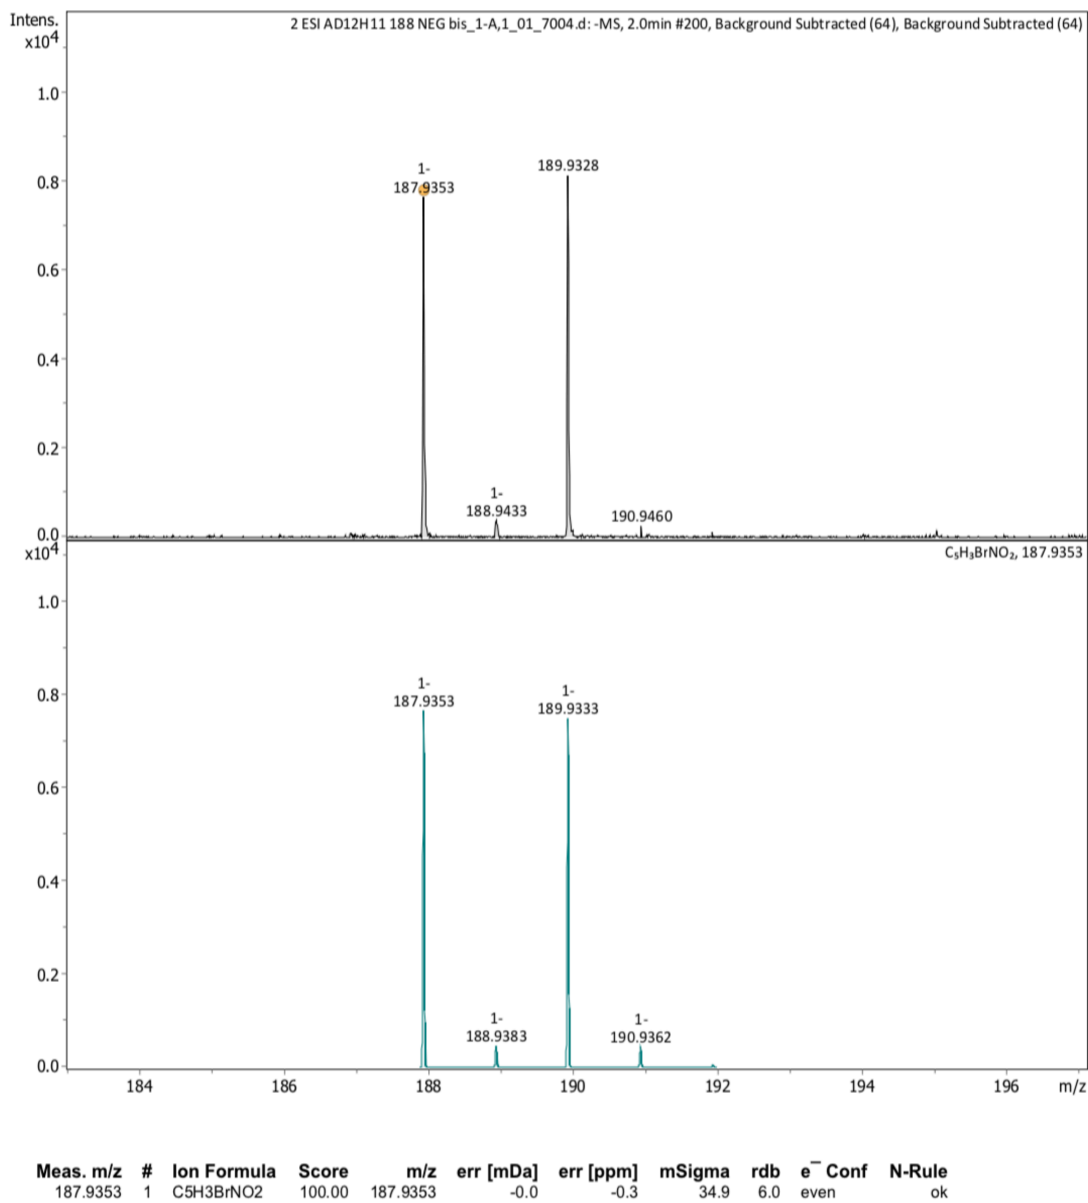

Figure S18. (-)-HRESIMS of 6.

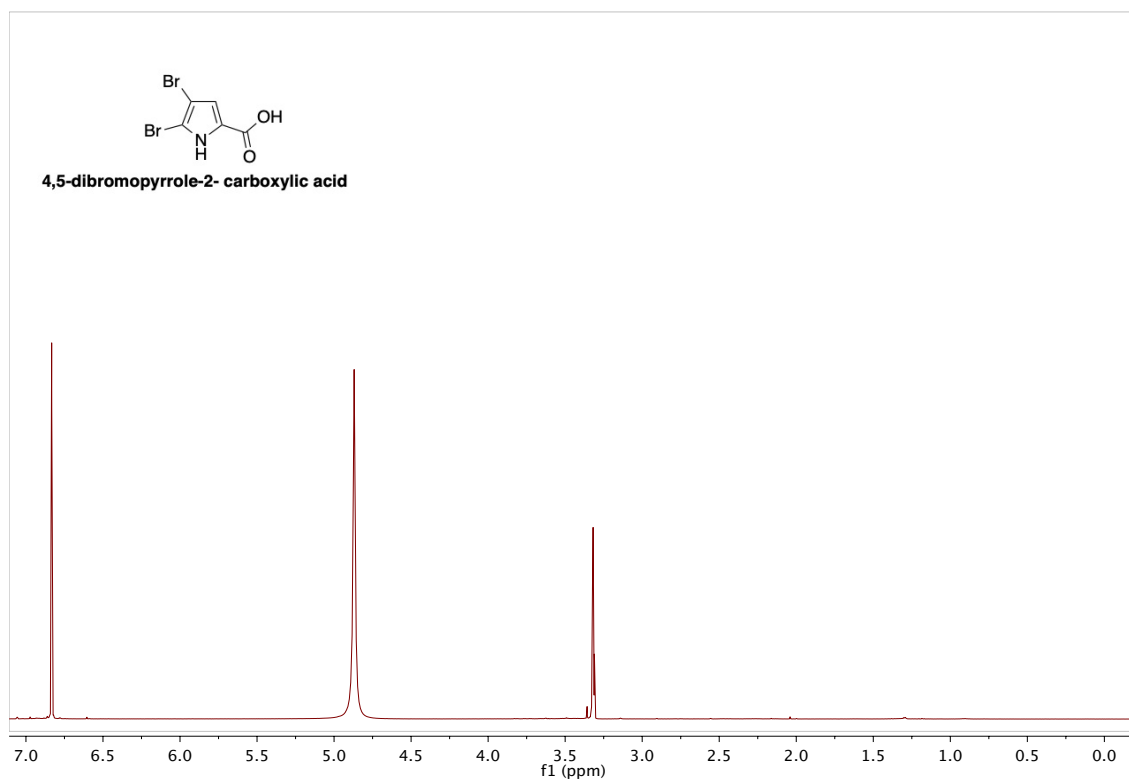

**Figure S19.**  $^1\text{H}$  NMR spectrum of **7** (500 MHz,  $\text{CD}_3\text{OD}$ ).

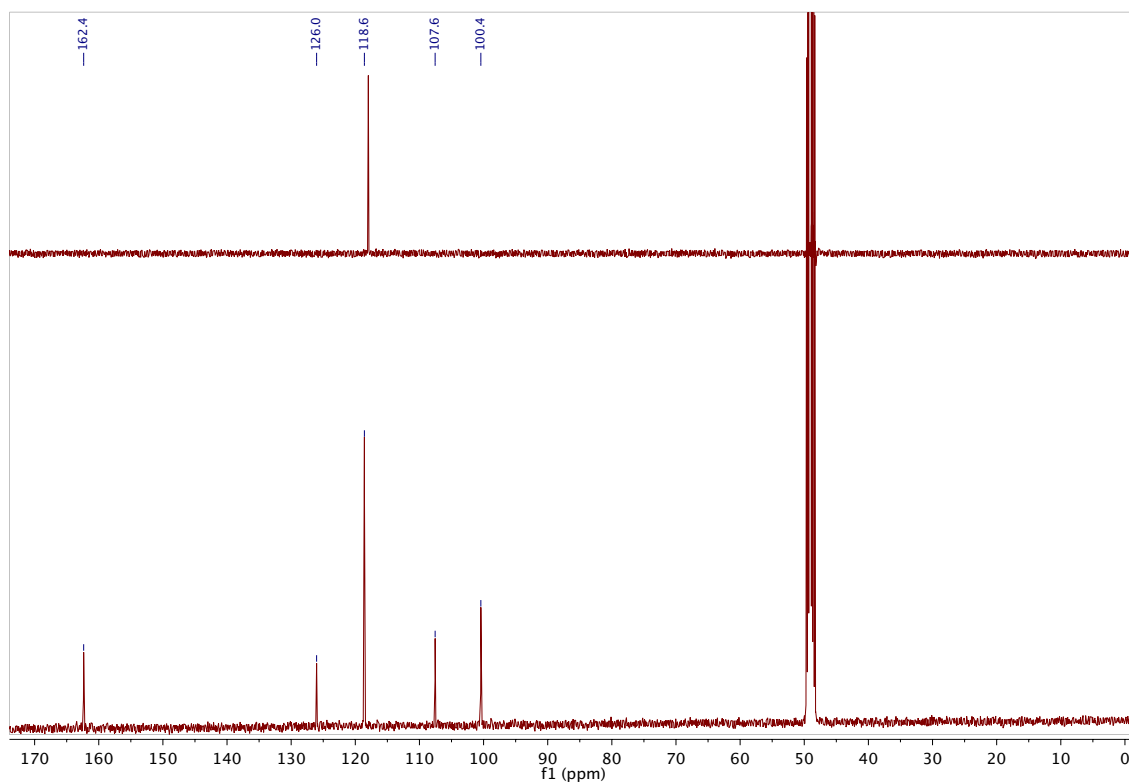

**Figure S20.**  $^{13}\text{C}$  NMR and DEPT-135 spectra of **7** (125 MHz,  $\text{CD}_3\text{OD}$ ).

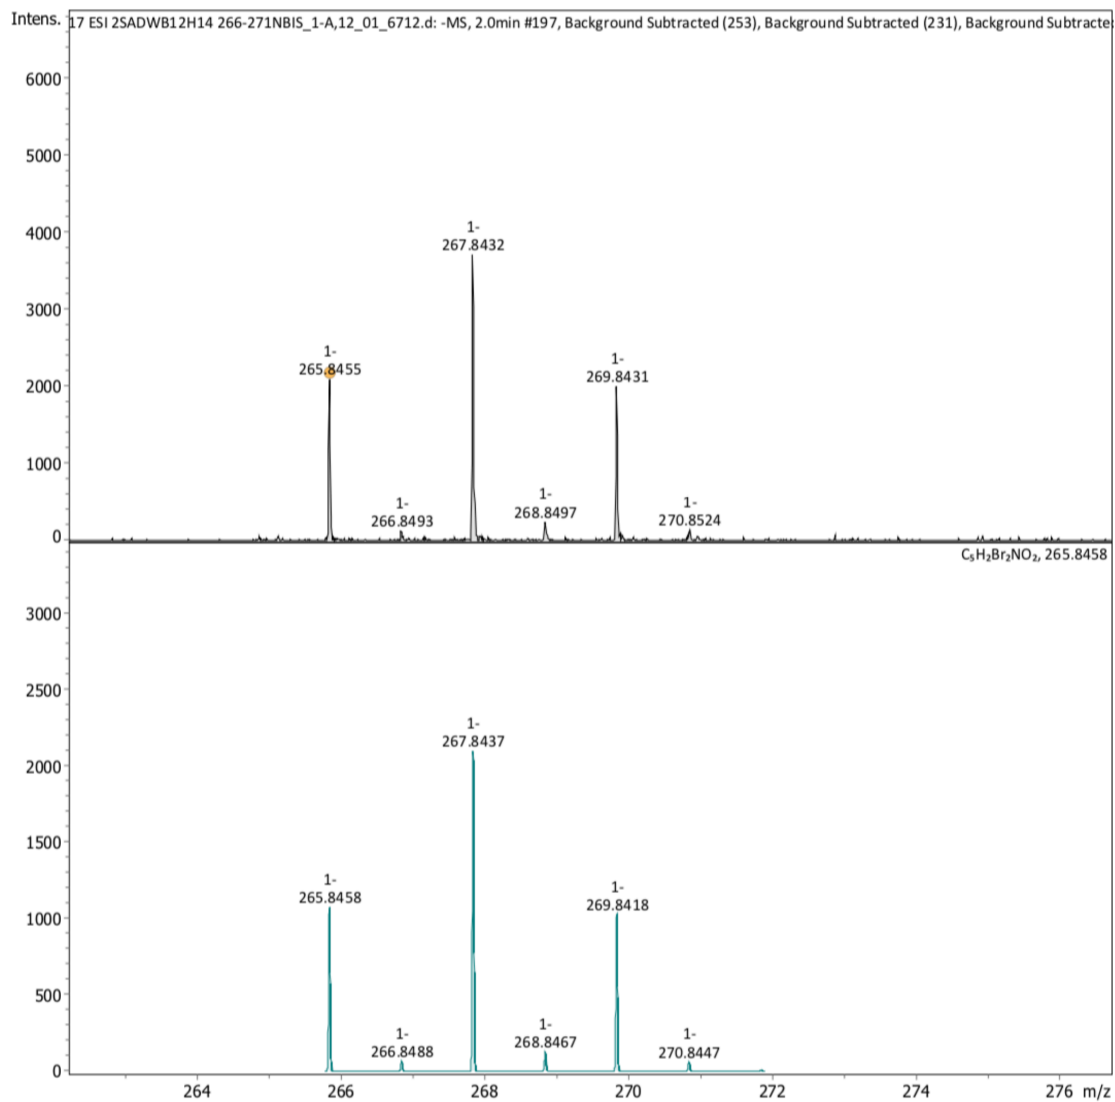

| Meas. m/z | # | Ion Formula                                                   | Score  | m/z      | err [mDa] | err [ppm] | mSigma | rdb | e <sup>-</sup> Conf | N-Rule |
|-----------|---|---------------------------------------------------------------|--------|----------|-----------|-----------|--------|-----|---------------------|--------|
| 265.8455  | 1 | C <sub>5</sub> H <sub>2</sub> Br <sub>2</sub> NO <sub>2</sub> | 100.00 | 265.8458 | 0.2       | 0.9       | 28.7   | 8.0 | even                | ok     |

Figure S21. (-)-HRESIMS of 7.



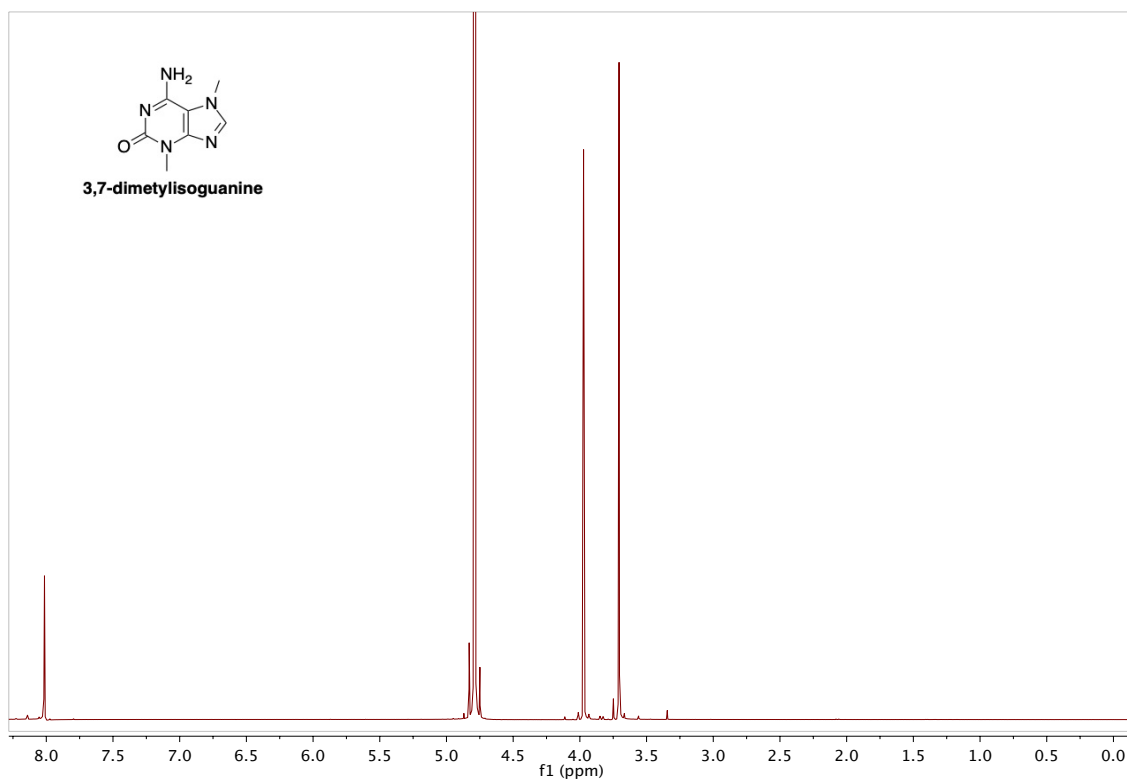

Figure S22. <sup>1</sup>H NMR spectrum of **8** (500 MHz, D<sub>2</sub>O).

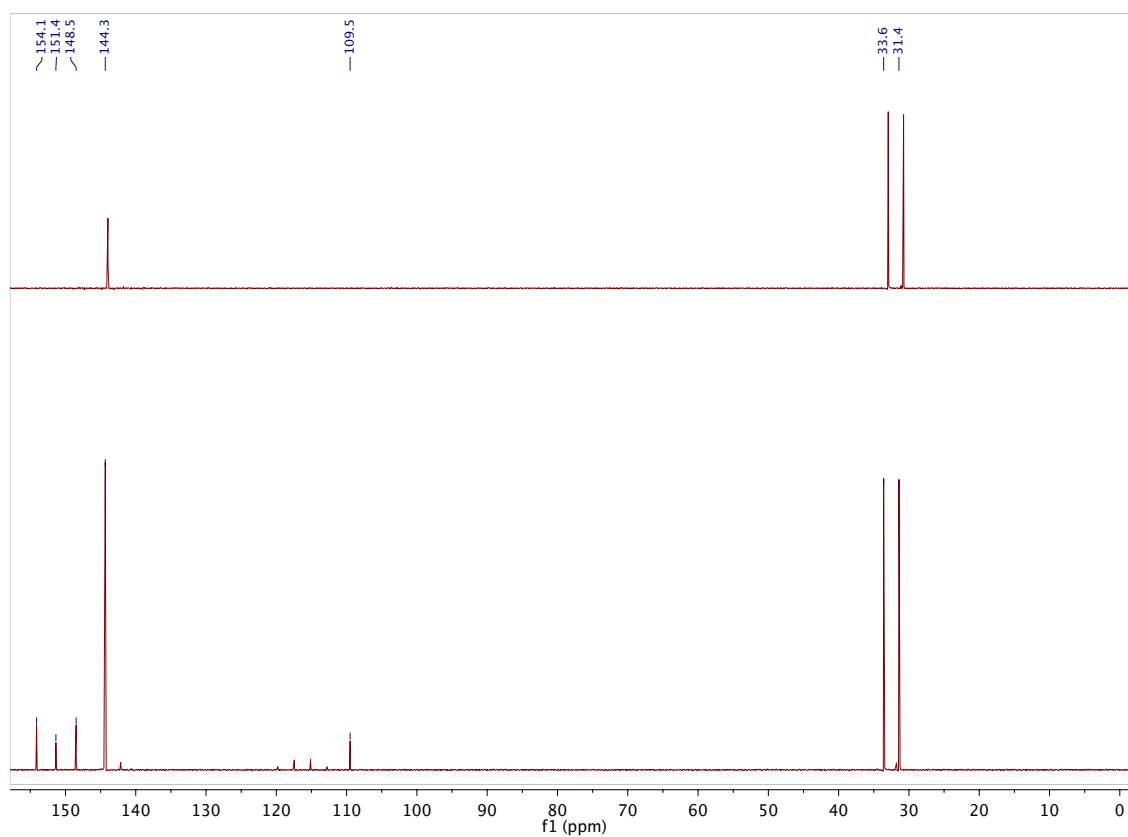

Figure S23. <sup>13</sup>C NMR and DEPT-135 spectra of **8** (125 MHz, D<sub>2</sub>O).

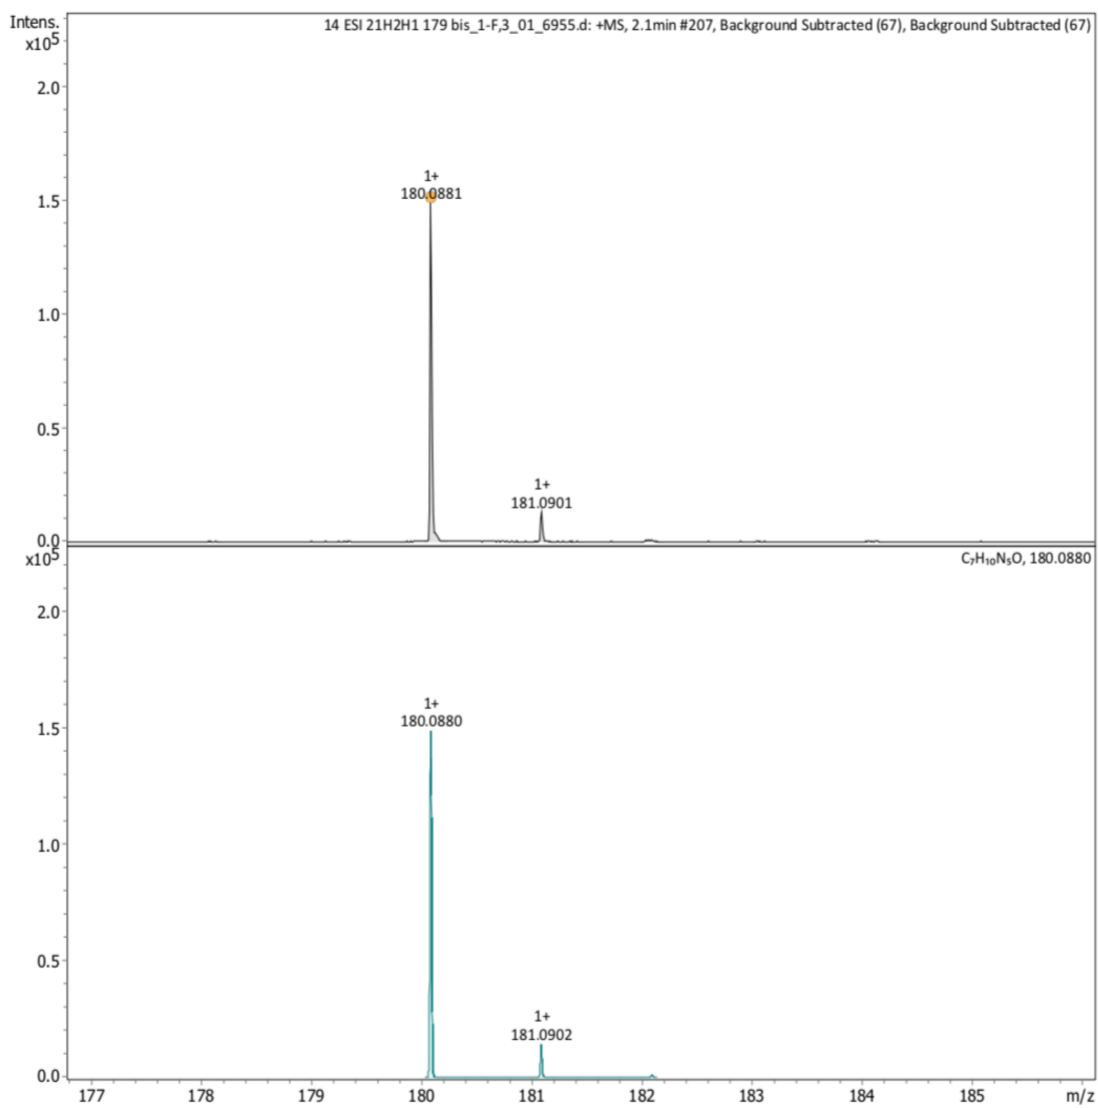

| Meas. m/z | # | Ion Formula                                     | Score  | m/z      | err [mDa] | err [ppm] | mSigma | rdb | e <sup>-</sup> Conf | N-Rule |
|-----------|---|-------------------------------------------------|--------|----------|-----------|-----------|--------|-----|---------------------|--------|
| 180.0881  | 1 | C <sub>7</sub> H <sub>10</sub> N <sub>3</sub> O | 100.00 | 180.0880 | -0.1      | -0.7      | 6.1    | 6.0 | even                | ok     |

Figure S24. (+)-HRESIMS of **8**.
